# Supplementary material
Source: Springer Nature journal article supplement (https://www.springermedizin.de/resource/supplementary/12889_2014_6608_MOESM1_ESM.pdf/9498652)
Supplement: MOESM1 [file 9498652]

**PEOPLE WHO VISITED COMMUNITY  
PHARMACIES FOR MEASUREMENT OF ANY OF  
THE FACTORS OF MetS**

N= 954

**CRITERIA OF SELECTION FROM THE STUDY**

- ✓ Age among 18-65 years
- ✓ Not having Diabetes
- ✓ Not having suffered any previous cardiovascular episode
  - ✓ They accept to participate (briefed consent)
  - ✓ Not being pregnant
- ✓ Not presenting cognitive impairment

**INCLUDED**

**N = 650 (68,1%)**

95,5% analyzed to MetS (621)  
4,5% missing values (29)

**EXCLUDED**

**N = 304 (31,9%)**

Previous diabetes: 13,4%  
Age: 7,0%  
No consent: 4,5%  
Previous CV episode: 3,5%  
Other: 2,7%  
Pregnancy: 0,5%
